# Supplementary material
Source: ML conference proceedings conference paper supplement (https://openreview.net/forum?id=Gba02UMvrG)

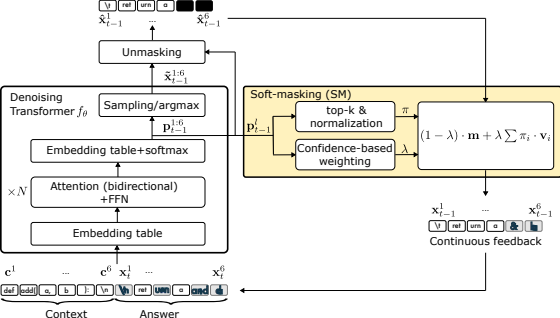

Supplement: supplementary_material [file architecture.pdf › soft-masked-dlm-main/assets/architecture.pdf]
